# Supplementary material
Source: publisher figshare collection journal article supplement (https://acs.figshare.com/ndownloader/files/14491148)
Supplement: Supplementary file 1 [file 14491148]

**Treatment of Hazardous Engineered Nanomaterials by Super-magnetized  $\alpha$ -Cellulose  
Fibers of Renewable Paper-waste Origin**

Avinash A. Kadam<sup>a</sup>, Saifullah Lone<sup>b</sup>, Surendra Shinde<sup>c</sup>, Jiwook Yang<sup>c</sup>, Rijuta Ganesh Saratale<sup>a</sup>,  
Ganesh Dattatraya Saratale<sup>d</sup>, Jung-Suk Sung<sup>e</sup>, Dae Young Kim<sup>c</sup>, and Gajanan Ghodake<sup>c\*</sup>

<sup>a</sup>Research Institute of Biotechnology & Medical Converged Science, Dongguk University-Seoul,  
32, Dongguk-ro, Ilsandong-gu, Goyang-si, Gyonggido 10326, Republic of Korea

<sup>b</sup> Department of Chemsitry, National Institutes of Technology, Srinagar, Hazratbal-190006  
Jammu and Kashmir, India

<sup>c</sup>Department of Biological and Environmental Science, College of Life Science and  
Biotechnology, Dongguk University-Seoul, 32, Dongguk-ro, Ilsandong-gu, Goyang-si,  
Gyonggido 10326, South Korea

<sup>d</sup>Department of Food Science and Biotechnology, Dongguk University-Seoul, 32, Dongguk-ro,  
Ilsandong-gu, Goyang-si, Gyonggido 10326, Republic of Korea

<sup>e</sup>Department of Life Science, College of Life Science and Biotechnology, Dongguk University-  
Seoul, 32, Dongguk-ro, Ilsandong-gu, Goyang-si, Gyonggido 10326, South Korea

**Corresponding author:** Gajanan Ghodake, Tel: +82-31-961-5159; Fax: +82-31-969-5122;  
Email: ghodakegs@gmail.com

Number of pages: 5

Number of figures: 4

Number of tables: 0

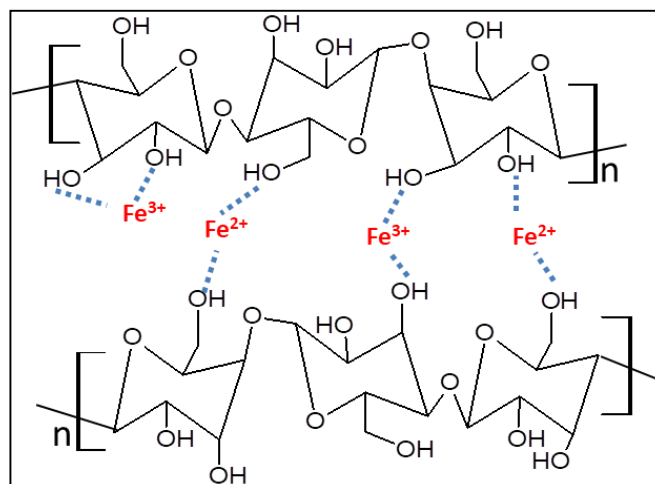

Chelation of iron ions (Fe<sup>3+</sup> and Fe<sup>2+</sup>).

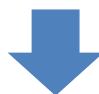

Co-precipitation

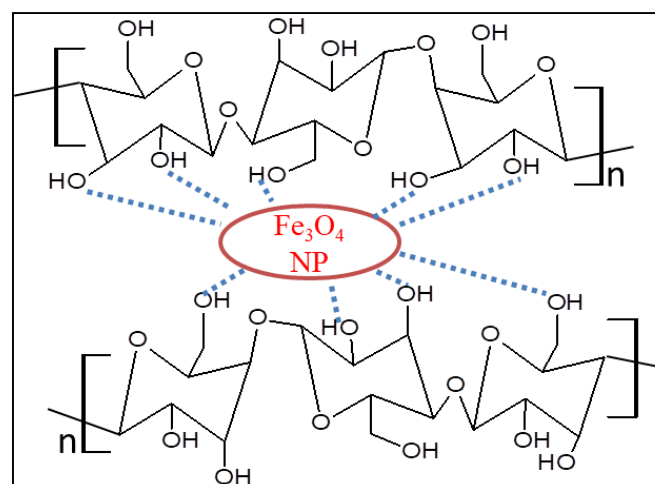

Formation of Fe<sub>3</sub>O<sub>4</sub> NPs on PW-αCFs

**Figure S1.** The schematic representation of the PW-αCFs magnetization.

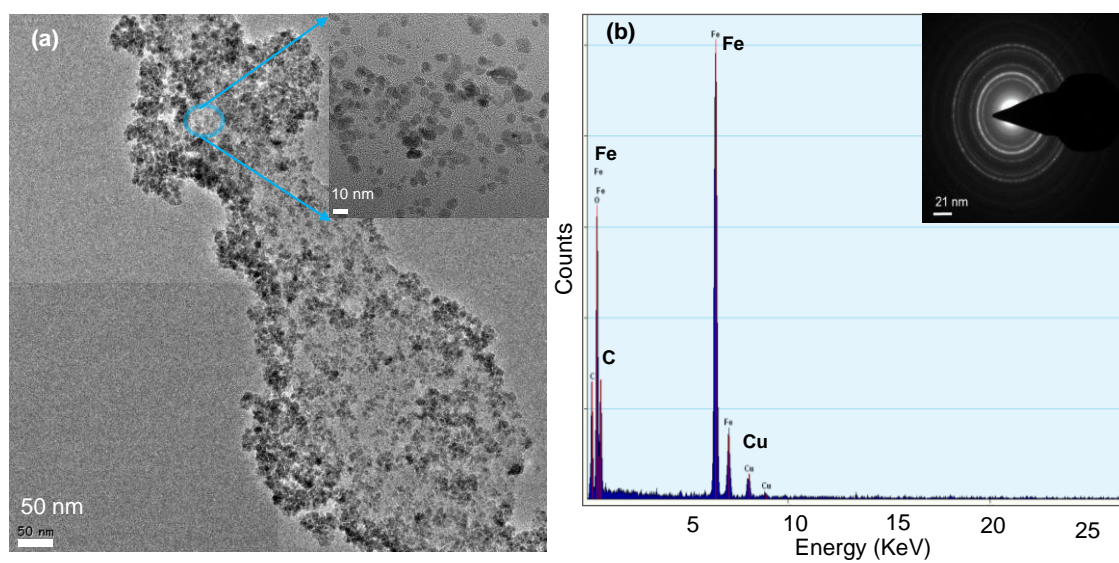

**Figure S2.** Imaging of adsorbents, (a) FE-TEM imaging of  $\text{Fe}_3\text{O}_4@\text{PW}-\alpha\text{CFs}$  (inset, magnified view), (b) EDS spectrum of  $\text{Fe}_3\text{O}_4@\text{PW}-\alpha\text{CFs}$  (inset, SAED pattern).

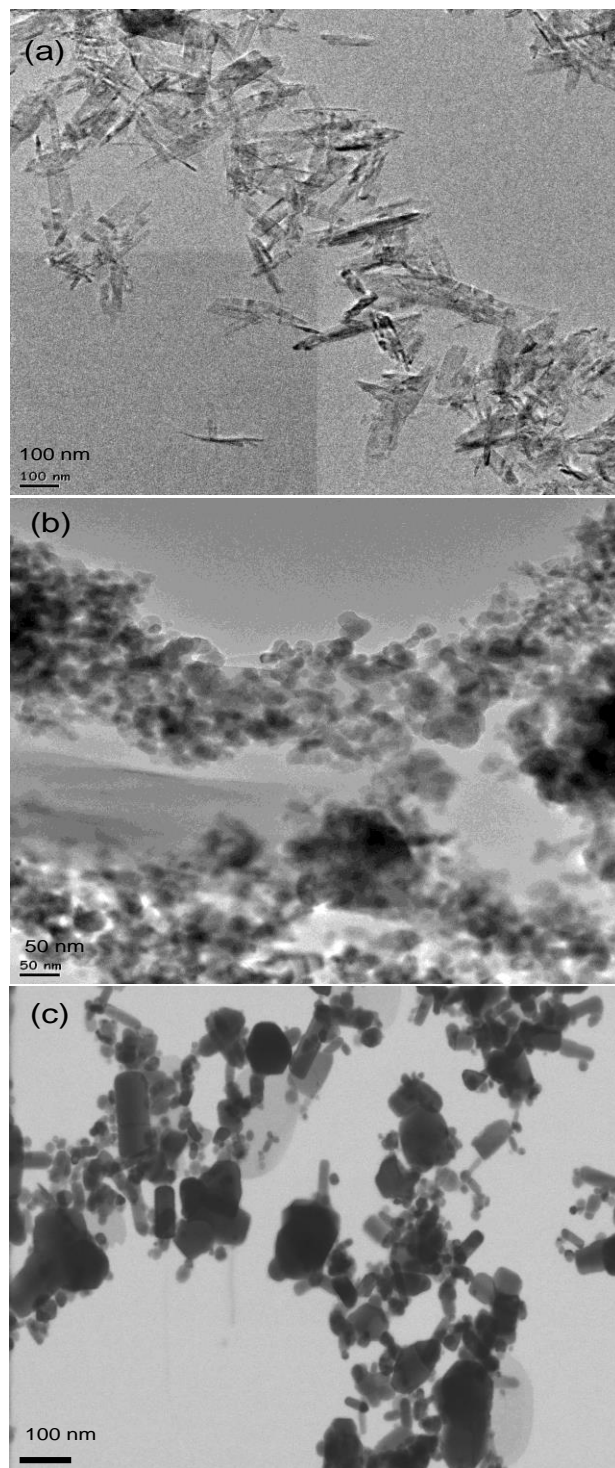

**Figure S3.** (a) A representative TEM image of CuO, (b) Representative TEM image of CoO, (c) Representative TEM image of ZnO.

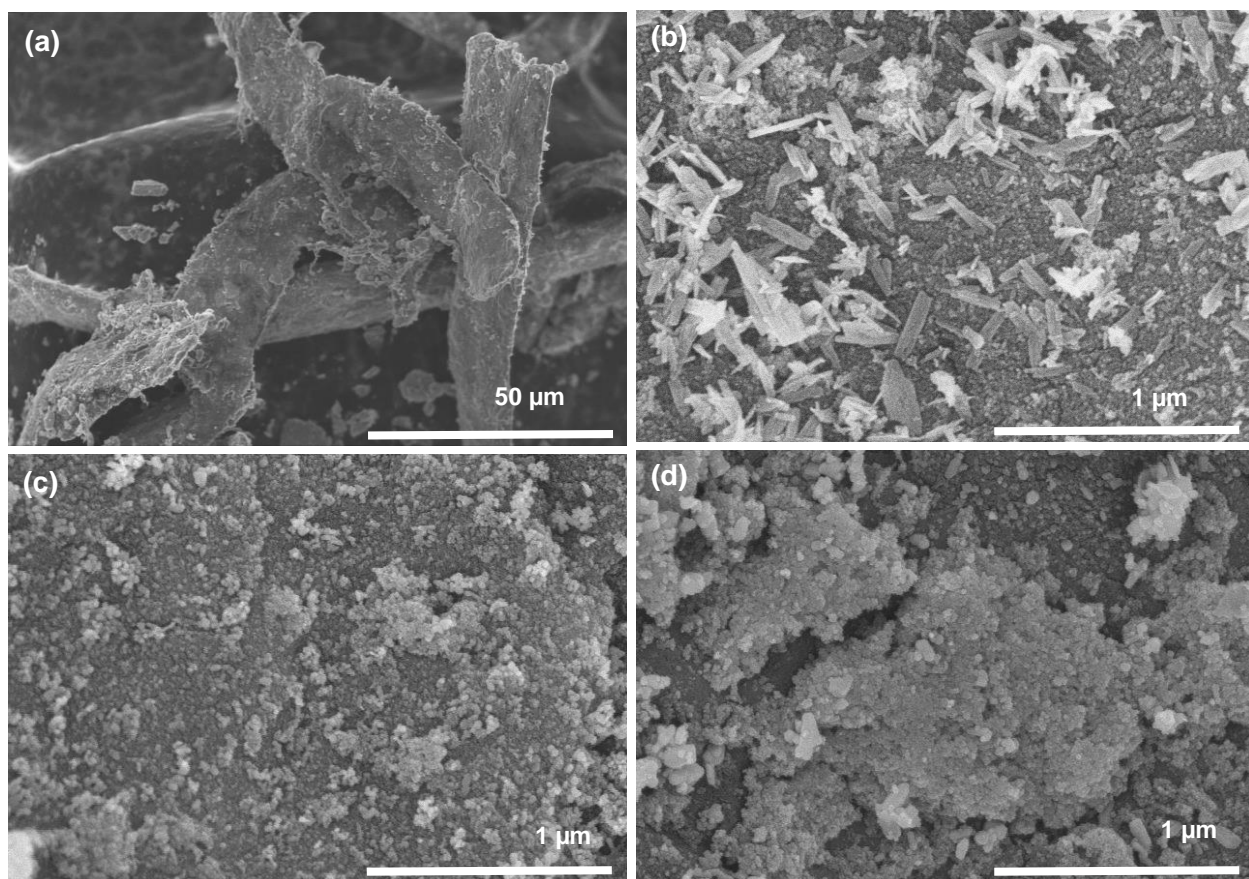

**Figure S4.** FE SEM imaging of the Fe<sub>3</sub>O<sub>4</sub>@PW-αCF surface, (a) Fe<sub>3</sub>O<sub>4</sub>@PW-αCF surface before the treatment, (b) Fe<sub>3</sub>O<sub>4</sub>@PW-αCF surface after the treatment of CuO, (c) Fe<sub>3</sub>O<sub>4</sub>@PW-αCF surface after the treatment of CoO, (d) Fe<sub>3</sub>O<sub>4</sub>@PW-αCF surface after the treatment of ZnO.
